# Supplementary material for: Development of a computerised decision aid for thrombolysis in acute stroke care
Source: Springer Nature journal article supplement (doi:10.1186/s12911-014-0127-1), 2015-02-06

## Additional file 1: Draft paper-based tools

### A: Structured look up table

#### NIHSS 13-18, Female, No History of Stroke, Age = 80

|                      |     | Onset Time to Treatment (minutes) |      |      |      |      |      |      |      |      |      |      |      |      |      |      |      |      |      |      |
|----------------------|-----|-----------------------------------|------|------|------|------|------|------|------|------|------|------|------|------|------|------|------|------|------|------|
|                      |     | 0                                 | 15   | 30   | 45   | 60   | 75   | 90   | 105  | 120  | 135  | 150  | 165  | 180  | 195  | 210  | 225  | 240  | 255  | 270  |
| Systolic BP<br>mm/Hg | 180 | 0.31                              | 0.31 | 0.31 | 0.31 | 0.31 | 0.31 | 0.31 | 0.31 | 0.31 | 0.31 | 0.31 | 0.31 | 0.31 | 0.31 | 0.31 | 0.31 | 0.31 | 0.31 | 0.31 |
|                      |     | 0.62                              | 0.61 | 0.59 | 0.58 | 0.56 | 0.55 | 0.54 | 0.52 | 0.51 | 0.49 | 0.48 | 0.47 | 0.45 | 0.44 | 0.42 | 0.41 | 0.40 | 0.38 | 0.37 |
|                      |     | 0.31                              | 0.29 | 0.28 | 0.27 | 0.25 | 0.24 | 0.22 | 0.21 | 0.20 | 0.18 | 0.17 | 0.15 | 0.14 | 0.13 | 0.11 | 0.10 | 0.08 | 0.07 | 0.06 |
|                      | 170 | 0.32                              | 0.32 | 0.32 | 0.32 | 0.32 | 0.32 | 0.32 | 0.32 | 0.32 | 0.32 | 0.32 | 0.32 | 0.32 | 0.32 | 0.32 | 0.32 | 0.32 | 0.32 | 0.32 |
|                      |     | 0.66                              | 0.64 | 0.63 | 0.62 | 0.60 | 0.59 | 0.58 | 0.56 | 0.55 | 0.54 | 0.52 | 0.51 | 0.49 | 0.48 | 0.47 | 0.45 | 0.44 | 0.42 | 0.41 |
|                      |     | 0.33                              | 0.32 | 0.31 | 0.29 | 0.28 | 0.27 | 0.25 | 0.24 | 0.23 | 0.21 | 0.20 | 0.18 | 0.17 | 0.16 | 0.14 | 0.13 | 0.11 | 0.10 | 0.09 |
|                      | 160 | 0.33                              | 0.33 | 0.33 | 0.33 | 0.33 | 0.33 | 0.33 | 0.33 | 0.33 | 0.33 | 0.33 | 0.33 | 0.33 | 0.33 | 0.33 | 0.33 | 0.33 | 0.33 | 0.33 |
|                      |     | 0.69                              | 0.68 | 0.67 | 0.66 | 0.64 | 0.63 | 0.62 | 0.60 | 0.59 | 0.58 | 0.56 | 0.55 | 0.53 | 0.52 | 0.51 | 0.49 | 0.48 | 0.46 | 0.45 |
|                      |     | 0.36                              | 0.35 | 0.33 | 0.32 | 0.31 | 0.30 | 0.28 | 0.27 | 0.26 | 0.24 | 0.23 | 0.21 | 0.20 | 0.19 | 0.17 | 0.16 | 0.14 | 0.13 | 0.12 |
|                      | 150 | 0.35                              | 0.35 | 0.35 | 0.35 | 0.35 | 0.35 | 0.35 | 0.35 | 0.35 | 0.35 | 0.35 | 0.35 | 0.35 | 0.35 | 0.35 | 0.35 | 0.35 | 0.35 | 0.35 |
|                      |     | 0.73                              | 0.72 | 0.70 | 0.69 | 0.68 | 0.67 | 0.66 | 0.64 | 0.63 | 0.62 | 0.60 | 0.59 | 0.58 | 0.56 | 0.55 | 0.53 | 0.52 | 0.51 | 0.49 |
|                      |     | 0.38                              | 0.37 | 0.36 | 0.35 | 0.34 | 0.32 | 0.31 | 0.30 | 0.28 | 0.27 | 0.26 | 0.24 | 0.23 | 0.22 | 0.20 | 0.19 | 0.17 | 0.16 | 0.15 |
|                      | 140 | 0.36                              | 0.36 | 0.36 | 0.36 | 0.36 | 0.36 | 0.36 | 0.36 | 0.36 | 0.36 | 0.36 | 0.36 | 0.36 | 0.36 | 0.36 | 0.36 | 0.36 | 0.36 | 0.36 |
|                      |     | 0.76                              | 0.75 | 0.74 | 0.73 | 0.72 | 0.70 | 0.69 | 0.68 | 0.67 | 0.65 | 0.64 | 0.63 | 0.62 | 0.60 | 0.59 | 0.58 | 0.56 | 0.55 | 0.53 |
|                      |     | 0.40                              | 0.39 | 0.38 | 0.37 | 0.36 | 0.35 | 0.34 | 0.32 | 0.31 | 0.30 | 0.29 | 0.27 | 0.26 | 0.25 | 0.23 | 0.22 | 0.20 | 0.19 | 0.18 |
|                      | 130 | 0.37                              | 0.37 | 0.37 | 0.37 | 0.37 | 0.37 | 0.37 | 0.37 | 0.37 | 0.37 | 0.37 | 0.37 | 0.37 | 0.37 | 0.37 | 0.37 | 0.37 | 0.37 | 0.37 |
|                      |     | 0.79                              | 0.78 | 0.77 | 0.76 | 0.75 | 0.74 | 0.73 | 0.71 | 0.70 | 0.69 | 0.68 | 0.67 | 0.65 | 0.64 | 0.63 | 0.61 | 0.60 | 0.59 | 0.57 |
|                      |     | 0.42                              | 0.41 | 0.40 | 0.39 | 0.38 | 0.37 | 0.36 | 0.35 | 0.34 | 0.32 | 0.31 | 0.30 | 0.29 | 0.27 | 0.26 | 0.25 | 0.23 | 0.22 | 0.21 |
|                      | 120 | 0.38                              | 0.38 | 0.38 | 0.38 | 0.38 | 0.38 | 0.38 | 0.38 | 0.38 | 0.38 | 0.38 | 0.38 | 0.38 | 0.38 | 0.38 | 0.38 | 0.38 | 0.38 | 0.38 |
|                      |     | 0.81                              | 0.81 | 0.80 | 0.79 | 0.78 | 0.77 | 0.76 | 0.75 | 0.74 | 0.73 | 0.71 | 0.70 | 0.69 | 0.68 | 0.67 | 0.65 | 0.64 | 0.63 | 0.61 |
|                      |     | 0.44                              | 0.43 | 0.42 | 0.41 | 0.40 | 0.39 | 0.38 | 0.37 | 0.36 | 0.35 | 0.34 | 0.32 | 0.31 | 0.30 | 0.29 | 0.27 | 0.26 | 0.25 | 0.24 |

At each interval, results are presented in the following order:

\* No treatment

No change / survival LOSS in independent state from treatment

Survival GAIN in independent state from treatment

\* Treatment with rt-PA

### B: Tables of decision rules

#### NIHSS 13-18 Male, History of Stroke, Age 80

|             |     | OTT windows for absolute gains in QALYs |                 |                | OTT windows for absolute gains in the proportion of survival - independent state (mRS 0-2) at 6 months |       |      | Proportion dead at 6 months                          |  |
|-------------|-----|-----------------------------------------|-----------------|----------------|--------------------------------------------------------------------------------------------------------|-------|------|------------------------------------------------------|--|
|             |     | > 0                                     | ≥ 0.25 (3 mths) | ≥ 0.5 (6 mths) | > 0                                                                                                    | ≥ 5   | ≥ 10 |                                                      |  |
| Systolic BP | 180 | ≤ 15                                    | **              | **             | **                                                                                                     | **    | **   | 9 out of 100 (treated)<br>9 out of 100 (not treated) |  |
|             | 170 | ≤ 45                                    | **              | **             | ≤ 45                                                                                                   | **    | **   |                                                      |  |
|             | 160 | ≤ 75                                    | **              | **             | ≤ 75                                                                                                   | ≤ 30  | **   |                                                      |  |
|             | 150 | ≤ 105                                   | **              | **             | ≤ 105                                                                                                  | ≤ 60  | **   |                                                      |  |
|             | 140 | ≤ 135                                   | **              | **             | ≤ 135                                                                                                  | ≤ 90  | ≤ 30 |                                                      |  |
|             | 130 | ≤ 165                                   | ≤ 15            | **             | ≤ 165                                                                                                  | ≤ 120 | ≤ 60 |                                                      |  |
|             | 120 | ≤ 195                                   | ≤ 60            | **             | ≤ 195                                                                                                  | ≤ 150 | ≤ 90 |                                                      |  |

Consult relevant look-up tables for specific figures

|             |     | OTT windows for absolute gains in mean life expectancy |                 |                | OTT windows for absolute gains in expected time - independent state (mRS 0-2) |                 |                | OTT windows for absolute decreases in expected time - dependent state (mRS 3-5) |                 |                | OTT windows for absolute gains in the proportion of survival at 5 years |     |      |
|-------------|-----|--------------------------------------------------------|-----------------|----------------|-------------------------------------------------------------------------------|-----------------|----------------|---------------------------------------------------------------------------------|-----------------|----------------|-------------------------------------------------------------------------|-----|------|
|             |     | > 0                                                    | ≥ 0.25 (3 mths) | ≥ 0.5 (6 mths) | > 0                                                                           | ≥ 0.25 (3 mths) | ≥ 0.5 (6 mths) | > 0                                                                             | ≥ 0.25 (3 mths) | ≥ 0.5 (6 mths) | > 0                                                                     | ≥ 5 | ≥ 10 |
| Systolic BP | 180 | ≤ 15                                                   | **              | **             | ≤ 15                                                                          | **              | **             | **                                                                              | **              | **             | **                                                                      | **  | **   |
|             | 170 | ≤ 45                                                   | **              | **             | ≤ 45                                                                          | **              | **             | ≤ 45                                                                            | **              | **             | ≤ 15                                                                    | **  | **   |
|             | 160 | ≤ 75                                                   | **              | **             | ≤ 75                                                                          | **              | **             | ≤ 75                                                                            | **              | **             | ≤ 45                                                                    | **  | **   |
|             | 150 | ≤ 105                                                  | **              | **             | ≤ 105                                                                         | ≤ 15            | **             | ≤ 105                                                                           | **              | **             | ≤ 75                                                                    | **  | **   |
|             | 140 | ≤ 135                                                  | **              | **             | ≤ 135                                                                         | ≤ 45            | **             | ≤ 135                                                                           | **              | **             | ≤ 105                                                                   | **  | **   |
|             | 130 | ≤ 165                                                  | **              | **             | ≤ 165                                                                         | ≤ 75            | **             | ≤ 165                                                                           | **              | **             | ≤ 135                                                                   | **  | **   |
|             | 120 | ≤ 195                                                  | ≤ 15            | **             | ≤ 195                                                                         | ≤ 105           | **             | ≤ 195                                                                           | **              | **             | ≤ 165                                                                   | **  | **   |

\*\* At this systolic BP value there is not an OTT window associated with a treatment benefit for this category

C: Flowchart diagram - horizontal orientation

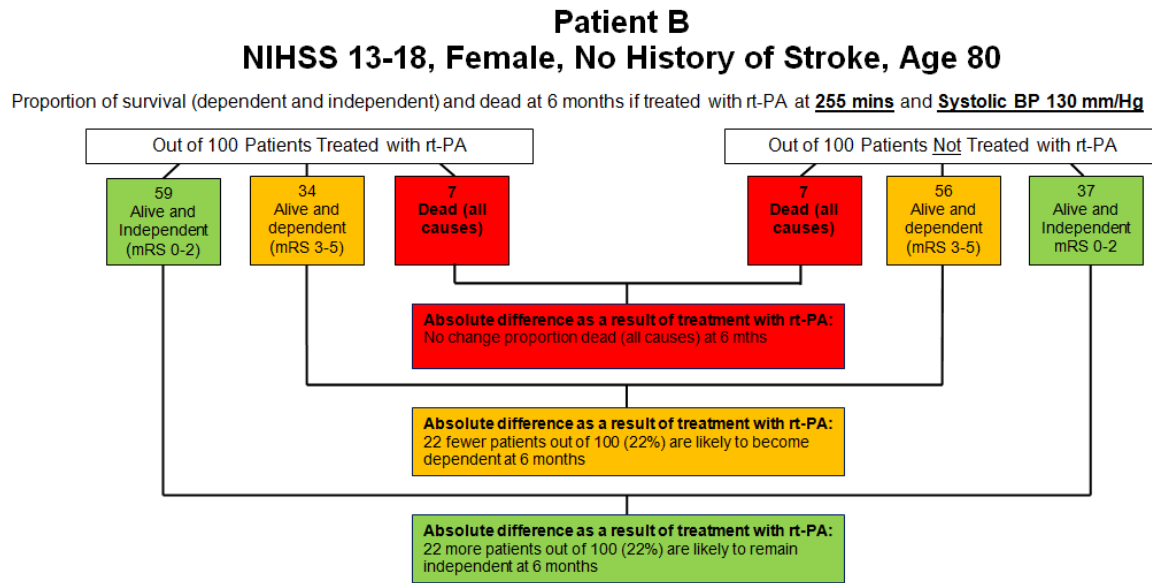

Proportion of SICH (SITS-MOST definition) and related outcomes after treatment with rt-PA

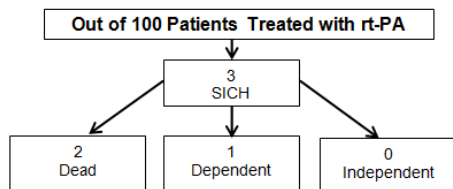

D: Pictograph

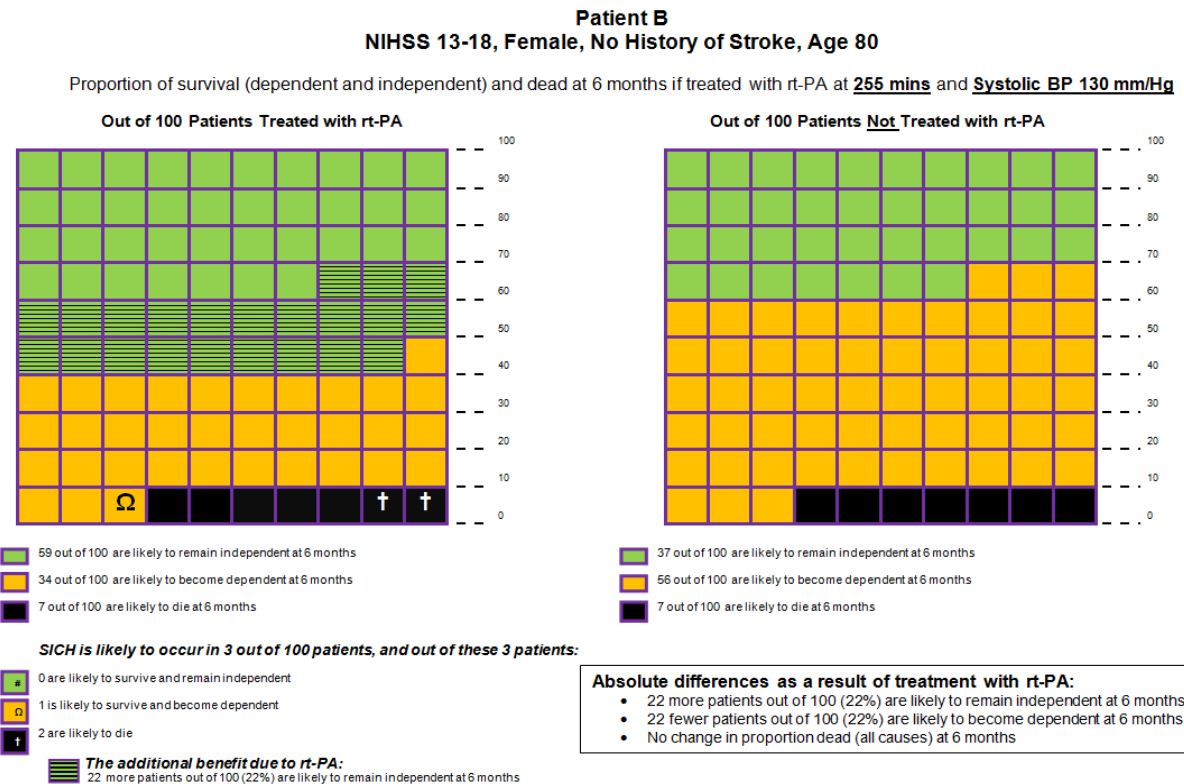

E: Stacked bar graph (independence, dependence and death)

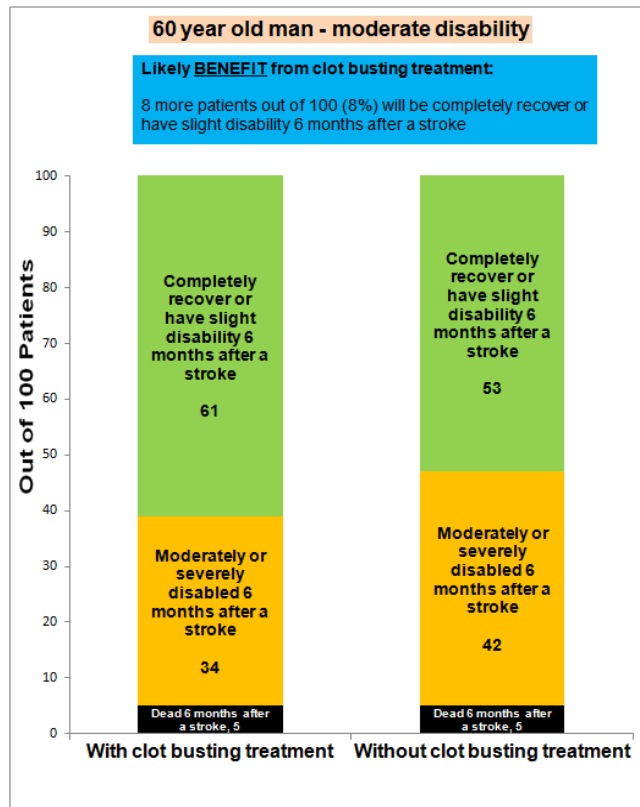

F: Clustered bar graph (life expectancy and expected time in independent and dependent state)

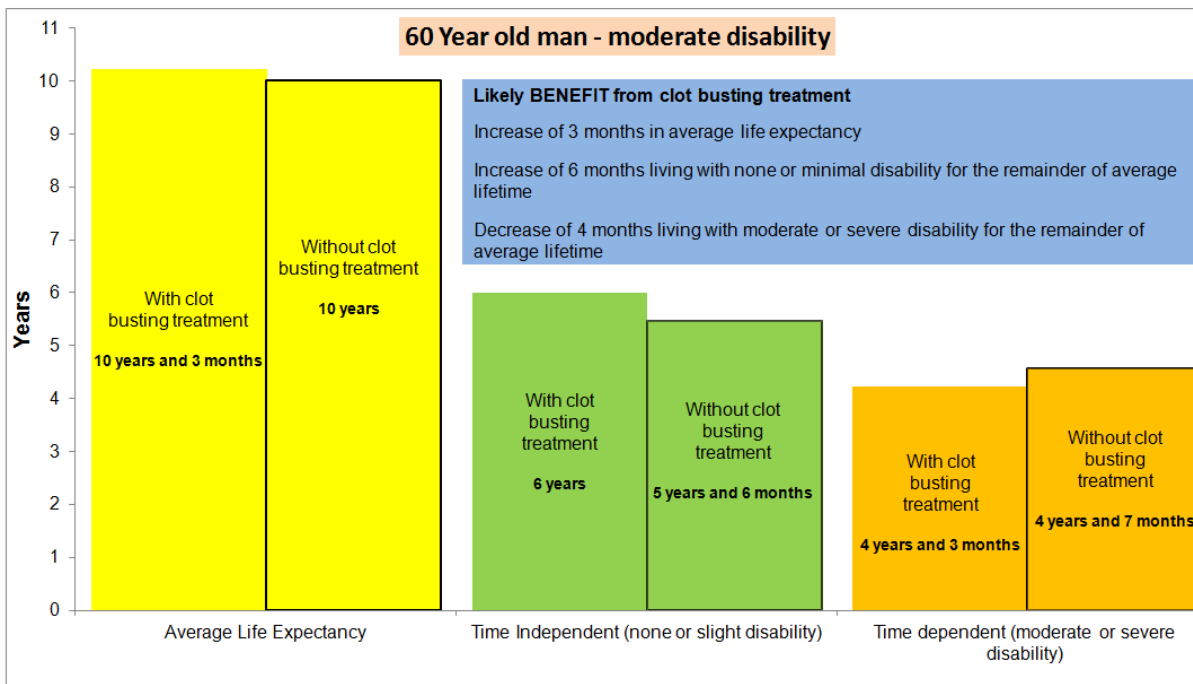

Supplement: 12911_2014_127_MOESM1_ESM.pdf [file 12911_2014_127_MOESM1_ESM.pdf]
