# Supplementary material for: Development of a computerised decision aid for thrombolysis in acute stroke care
Source: Springer Nature journal article supplement (doi:10.1186/s12911-014-0127-1), 2015-02-06
Supplement: 12911_2014_127_MOESM2_ESM.pdf [file 12911_2014_127_MOESM2_ESM.pdf]

**Additional file 2. Paper-based self-completion form**

| <b>A</b><br>Was the patient treated with IV rt-PA? | <b>B</b><br>Was the decision aid used?<br><i>(enter all that apply)</i> | <b>C</b><br>If NO for B, please could you briefly state why the decision aid was <u>not</u> used on this occasion? | <b>D</b><br>Platform used | <b>E</b><br>Time taken to use (approx) | <b>F</b><br>How was the decision aid useful for eligibility selection? | <b>G</b><br>Method of presenting information to patients / families?<br><i>(enter all that apply)</i> | <b>H***</b><br>Did the decision aid report any errors? If YES please state: | <b>I</b><br>Would you use the decision aid again? | <b>J</b><br>If you answered NO to I, please could you briefly explain why? |
|----------------------------------------------------|-------------------------------------------------------------------------|--------------------------------------------------------------------------------------------------------------------|---------------------------|----------------------------------------|------------------------------------------------------------------------|-------------------------------------------------------------------------------------------------------|-----------------------------------------------------------------------------|---------------------------------------------------|----------------------------------------------------------------------------|
| Yes or No                                          | Any of 1, 2, 3, 4 or 5                                                  | Free Text                                                                                                          | 1, 2, 3 or 4              | in minutes                             | Free Text                                                              | Any of 1, 2, 3, 4, 5, 6 or N/A                                                                        | Free Text                                                                   | Yes or No                                         | Free Text                                                                  |
|                                                    |                                                                         |                                                                                                                    |                           |                                        |                                                                        |                                                                                                       |                                                                             |                                                   |                                                                            |

| <b>B. Was the decision aid used?</b>    | <b>D. Platform used</b> | <b>G. Method of presenting information to patients / families?</b> |
|-----------------------------------------|-------------------------|--------------------------------------------------------------------|
| 1 = yes for eligibility decision making | 1 = iPad                | 1 = verbal presentation only                                       |
| 2 = yes (consent with patient)          | 2 = Web                 | 2 = risk presentations (iPad)                                      |
| 3 = yes (consent with family)           | 3 = Stand-alone version | 3 = risk presentations (paper)                                     |
| 4 = yes (consent with patient + family) | 4 = Smartphone          | 4 = pictograph                                                     |
| 5 = no                                  |                         | 5 = bar graph                                                      |
|                                         |                         | 6 = flowchart                                                      |
|                                         |                         | 7 = N/A                                                            |

Any further feedback would be greatly appreciated. You can leave further feedback on the DASH II website and get in touch with the DASH II team by email
